# Supplementary material for: Bowel ischaemia in COVID-19 infection: a scoping review protocol
Source: HighWire-hosted journal article supplement (doi:10.1136/bmjopen-2021-060566), 2022-09-01
Supplement: bmjopen-2021-060566supp001_data_supplement.pdf [file bmjopen-2021-060566supp001_data_supplement.pdf]

## Appendices

### Appendix I: Search strategy

("Coronavirus disease" OR "coronavirus infections" OR "COVID-19" OR "2019-nCoV" OR "SARS-CoV-2" )  
AND clinical AND ("Intestinal isch\*" OR "bowel isch\*" OR "mesenteric isch\*" OR "thromb\*" ) AND Imaging
